# Supplementary material for: Genome-Wide Mouse Mutagenesis Reveals CD45-Mediated T Cell Function as Critical in Protective Immunity to HSV-1
Source: PubMed Central journal article supplement (PMC3771889; doi:10.1371/journal.ppat.1003637), 2013-09-12

**A**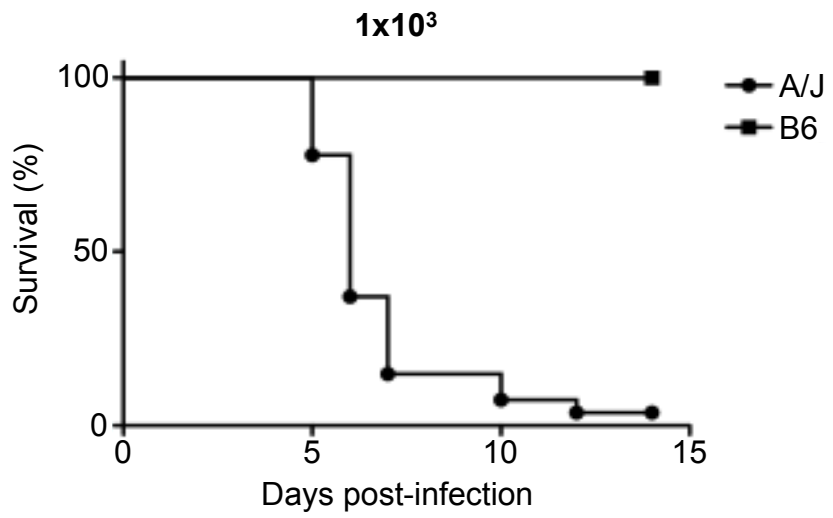**B**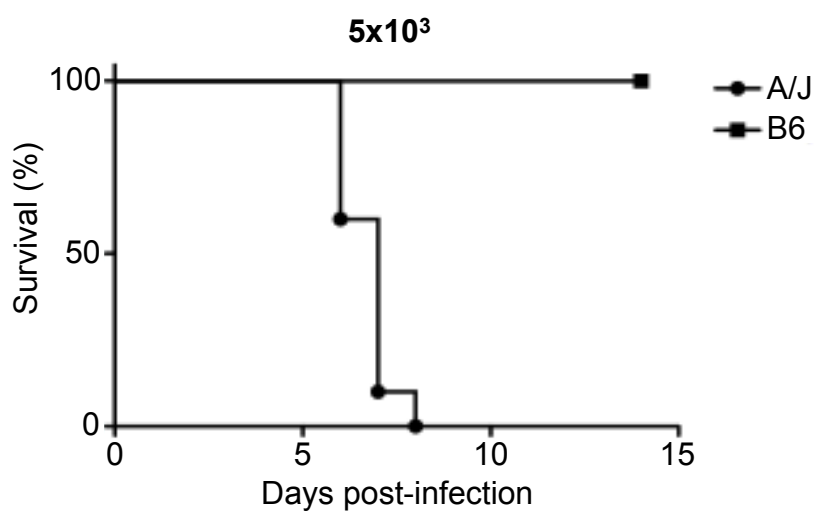**C**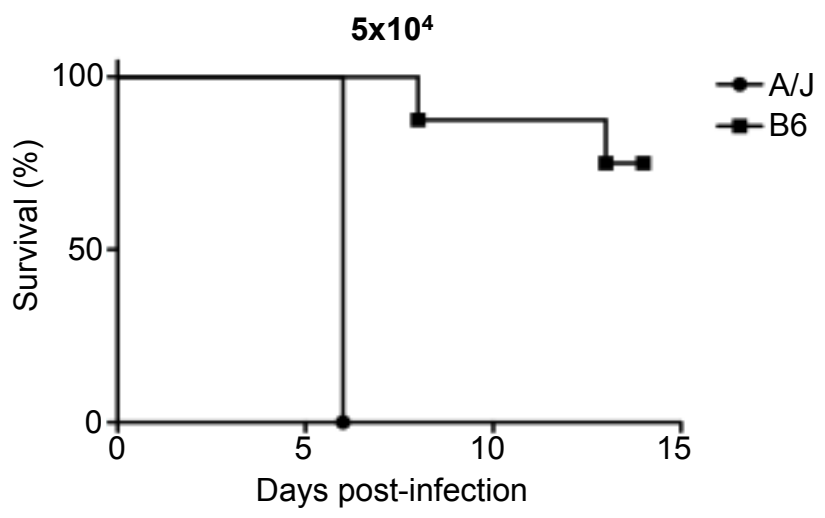

Supplement: ppat.1003637.s002.pdf [file ppat.1003637.s002.pdf]
